# Supplementary material
Source: PubMed Central journal article supplement (PMC3098734)
Supplement: supp_ddr147_ddr147supp_figure1.pdf [file supp_ddr147_ddr147supp_figure1.pdf]

Comley et al – Supplementary Figure 1

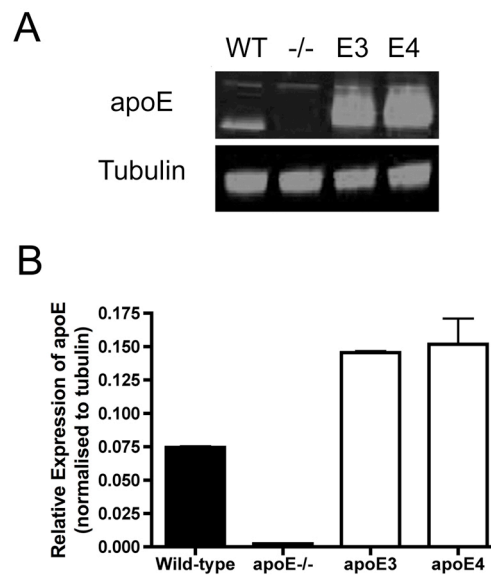

**Supplementary figure 1. Delayed axon regeneration and neuromuscular reinnervation in apoE4 mice is a specific response to the E4 isoform of apoE, and is not due to differing expression levels from human apoE transgenes after nerve injury.** **A:** Representative fluorescent Western blots showing levels of apoE and tubulin (loading control) protein extracted from sciatic nerves 3 weeks after nerve injury. Qualitative analysis of bands indicated no obvious difference in expression levels between apoE3 and apoE4 isoforms. **B:** Bar chart (mean±SEM) showing quantification of Western blots. There was no difference in the levels of apoE3 and apoE4 protein expressed in distal nerve stumps (N=2 per genotype).
