# Supplementary material
Source: PubMed Central journal article supplement (PMC3098734)
Supplement: supp_ddr147_ddr147supp_figure2.pdf [file supp_ddr147_ddr147supp_figure2.pdf]

Comley et al – Supplementary Figure 2

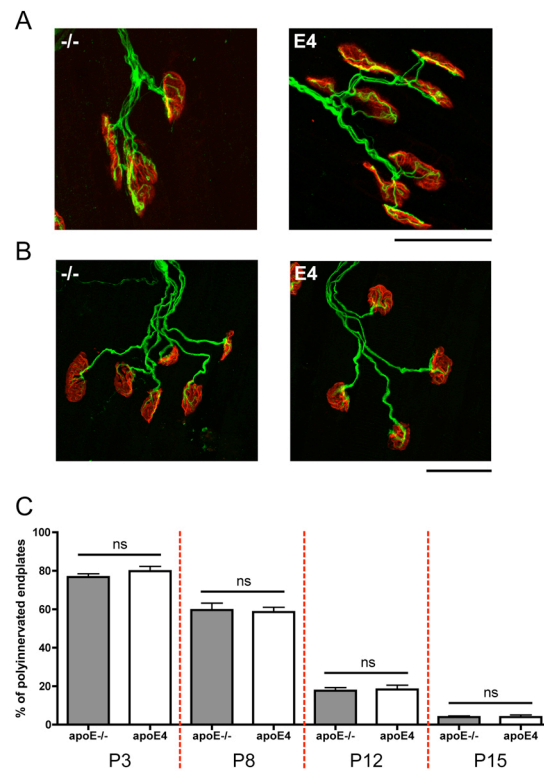

**Supplementary figure 2. Expression of apoE4 has no effect on developmental plasticity at the neuromuscular junction. A/B:** Representative confocal micrographs showing immunohistochemically labelled NMJs in LAL muscles from apoE<sup>-/-</sup> (-/-) and apoE<sup>E4</sup> (E4) mice at postnatal day 3 (A) and 15 (B). Note the presence of multiple axons (green) converging on single motor endplates (red) in A. Scale bar=30 $\mu$ m. By P15 the process of neonatal synapse elimination has remodelled the vast majority of neuromuscular junctions into the adult mono-innervated state (B). Scale bar=30 $\mu$ m **C:** Bar chart (mean $\pm$ SEM) showing no significant difference in the progression of neonatal synapse elimination in apoE<sup>E4</sup> mice compared to apoE<sup>-/-</sup> controls at any time-point examined ( $P>0.05$  for all time points; Mann-Whitney test, two tailed; P3 apoE<sup>-/-</sup> N=8, apoE<sup>E4</sup> N=10; P8 apoE<sup>-/-</sup> N=12, apoE<sup>E4</sup> N=20; P12 apoE<sup>-/-</sup> N=4, apoE<sup>E4</sup> N=25; P15 apoE<sup>-/-</sup> N=50, apoE<sup>E4</sup> N=11).
